# Supplementary material for: Positional isomer engineering of carbazole-based hole transport materials for perovskite solar cells
Source: Royal Society of Chemistry journal article supplement (doi:10.1039/d5nj04807a), 2026-01-01
Supplement: d5nj04807a1.pdf [file d5nj04807a1.pdf]

Supporting Information

**Supporting Information for**  
**Positional Isomer Engineering of Carbazole-Based Hole Transport**  
**Materials for Perovskite Solar Cells**

Xiangyu Ni,<sup>a</sup> Cheng Chen,<sup>\*a</sup> Ziyang Xia,<sup>a</sup> Ziqi Zhao,<sup>a</sup> Haoxin Wang,<sup>\*a</sup> Bin Cai,<sup>a</sup> Ming  
Cheng<sup>a</sup>

<sup>a</sup> Institute for Energy Research, School of Future Technology, Jiangsu University,  
Zhenjiang 212013, China.

\* E-mail: [chencheng@ujs.edu.cn](mailto:chencheng@ujs.edu.cn) (C. Chen); [wanghaoxin@ujs.edu.cn](mailto:wanghaoxin@ujs.edu.cn) (H. Wang)

## 1. Materials

The raw materials and palladium catalysts used for TCBZ - 27 and TCBZ - 36 molecules were purchased from Energy Chemicals, China. Fluorine doped tin oxide (FTO) coated glass (TEC;  $7\ \Omega\text{sq}^{-1}$ , Advanced Election Technology Co., Ltd.), Bis (2,4 - pentane dioic acid) bis (2 - propanoic acid) titanium (IV) (75% in Isopropyl Alcohol, TCI), ethanol ( $\geq 99.5\%$ , Aladdin), tin (IV) oxide ( $\text{SnO}_2$ ) colloid precursor (15% in  $\text{H}_2\text{O}$  colloidal dispersion, Alfa Aesar), polyacrylic acid (PAA, avg. MW = 450000, Sigma-Aldrich), formamidine iodide (FAI; 99.90%, Advanced Election Technology Co., Ltd.), lead (II) iodide ( $\text{PbI}_2$ ; 99.999%, Advanced Election Technology Co., Ltd.), Methylammonium tribromoplumbate(II) ( $\text{MAPbBr}_3$  99%, Xi'an Polymer Light Technology Corp.), Methylammonium chloride ( $\text{MACl}$ ; 99.5%, Xi'an Polymer Light Technology Corp.), Spiro - OMeTAD (99.86%, S1 Advanced Election Technology Co., Ltd.), Lithium bis(trifluoromethanesulfonyl)imide (Li - TFSI; 99%, Xi'an Polymer Light Technology Corp.), 4-tert-butylpyridine (tBP; 99%, Xi'an Polymer Light Technology Corp.), *N,N*-dimethylformamide (DMF; 99.8%, Sigma-Aldrich), dimethyl sulfoxide (DMSO; 99.9%, Sigma-Aldrich), chlorobenzene (CB; 99.8%; Sigma-Aldrich). All the solvents and chemicals were used as received unless specially stated.

## 2. Perovskite Solar Cell Fabrication

The n-i-p structured photovoltaic device ( $\text{FTO}/\text{c-TiO}_2/\text{SnO}_2/\text{FAPbI}_3/\text{BAI}/\text{Spiro-OMeTAD}/\text{Au}$ ) was constructed through sequential deposition of functional layers. Initially, patterned FTO substrates underwent ultrasonic cleaning in a detergent solution, deionized water, acetone, and ethanol (30 min each).

## Supporting Information

### Electron Transport Layer Preparation:

c-TiO<sub>2</sub> Layer: A precursor solution was formulated by diluting 1 mL titanium (IV) bis(2,4-glutamate) bis(2-propanolate) (75% isopropanol) with 19 mL anhydrous ethanol. The preheated FTO substrate (500°C) was coated via spray pyrolysis, followed by annealing at 500°C for 60 min and cooling to ambient temperature. Oxygen plasma treatment (25 min) enhanced surface activity.

SnO<sub>2</sub> Layer: A PAA-modified SnO<sub>2</sub> colloid precursor (20× diluted with H<sub>2</sub>O, mixed with 1 mg/mL PAA at 80°C for 3 h) was spin-coated (4,000 rpm, 30 s) onto c-TiO<sub>2</sub>. Post-annealing at 160°C for 30 min, substrates received oxygen plasma treatment (8 min) prior to transferring to a glovebox.

Perovskite Active Layer Deposition: The FAPbI<sub>3</sub> precursor solution—containing PbI<sub>2</sub> (705.2 mg), FAI (240.8 mg), MACl (33.8 mg), and MAPbBr<sub>3</sub> (5.8 mg) in DMF:DMSO (8:1)—was spin-coated using a two-step protocol: 1,000 rpm (10 s) and 6,000 rpm (30 s). During the second step, 100 µL chlorobenzene was dripped for film passivation. Thermal annealing at 120°C for 60 min yielded crystallized perovskite films.

Fabrication of the Passivation Layer: A BAI solution was prepared by dissolving 3 mg of butylammonium iodide (BAI) in 10 mL of isopropanol under vigorous stirring at room temperature overnight. The FTO substrate with the pre-deposited perovskite layer was immediately transferred into a nitrogen glovebox. The substrate was placed on a spin coater, and 40 µL of the BAI solution was uniformly spread over the perovskite surface using a pipette. Subsequently, spin-coating was performed at 4000

rpm for 30 s to form the passivation layer.

Hole Transport Layer & Electrode Integration: TCBZ-27 (73 mg/mL in chlorobenzene) doped with 29  $\mu$ L tBP and 17.5  $\mu$ L Li-TFSI (520 mg/mL) spin-coated (3,000 rpm, 30 s) onto the perovskite layer. Finally, a 100-nm Au electrode was thermally evaporated to complete the device architecture.

### 3. Characterization and measurement

Hole mobility was measured by using the space-charge-limited current (SCLC) method with the device structure of ITO/PEDOT: PSS/HTM/Au<sup>[1]</sup>.

$$J = \frac{9\mu\epsilon_0\epsilon_r V^2}{8d^3}$$

where  $\mu$  is the hole mobility,  $\epsilon_0$  is the dielectric constant of the vacuum,  $\epsilon_r$  is the dielectric constant of the hole-transporting material,  $V$  is the bias voltage applied to the device,  $d$  is the film thickness of the hole-transporting material.

The electrical conductivities of the HTM films were determined by using two-probe electrical conductivity measurements. The electrical conductivity ( $\sigma$ ) was calculated by using the following equation:

$$\sigma = W/(RLD)$$

where  $L$  is the channel length 10 mm,  $W$  is the channel width 2 mm,  $D$  is the film thickness of the  $\text{TiO}_2$  and HTM, and  $R$  is the film resistance calculated from the gradients of the curves.

The electrochemical impedance spectroscopy (EIS) was performed using a two-electrode system under dark conditions with electrochemical workstation (Zahner PP211). The EIS spectra were recorded in frequency from 100 mHz to 1 MHz with a

bias voltage of 1.20 V.

For device characterization, all current-voltage (I-V) characteristics of the devices were measured under simulated AM1.5G irradiation (100 mW/cm<sup>2</sup>) using a Xe lamp-based SS-F5-3A Solar Simulator. A Xe lamp equipped with an AM1.5G filter was used as the white light source. The light intensity was controlled with an NREL-calibrated Si solar cell with a KG-5 filter. The devices were measured both in reverse scan (1.2 V→-0.2 V, step 0.02 V) and forward scan (-0.2 V→1.2 V, step 0.02 V) with 2 ms delay time. The external quantum efficiency (EQE) was measured by a QE-R3011 measurement system.

#### **4. Synthesis and Characterization of materials**

The synthetic routes and molecular structures of the newly developed hole-transport materials (HTMs) TCBZ-27 and TCBZ-36 are shown in Scheme 1. Compounds 1, 2, 4, and 5 were synthesized according to reported literature procedures<sup>[2-5]</sup>. All reactions involving air- or moisture-sensitive reagents were carried out under a dry nitrogen atmosphere using standard Schlenk techniques unless otherwise stated. Glassware was oven-dried at 120°C for at least 12 h and cooled under nitrogen prior to use. Organic solvents were dried and degassed before use when required. Both HTMs were obtained through a five-step synthetic route starting from low-cost commercial precursors, with an overall yield of approximately 33%.

##### **Synthesis of Compound 3**

A dry 100 mL two-neck round-bottom flask equipped with a magnetic stir bar was evacuated and backfilled with nitrogen three times. Under a nitrogen atmosphere, 6-

## Supporting Information

bromo-9-ethyl-N,N-bis(4-methoxyphenyl)-9H-carbazol-3-amine (compound 2, 1.50 g, 2.99 mmol), bis(pinacolato)diboron (1.14 g, 4.48 mmol, 1.5equiv), potassium acetate (KOAc, 880 mg, 8.97 mmol, 3.0equiv), and Pd(dppf)Cl<sub>2</sub> (70 mg, 0.09 mmol, 3 mol%) were added to the flask. Anhydrous 1,4-dioxane (20 mL, reaction concentration  $\approx$  0.15 M with respect to compound 2) was degassed by bubbling nitrogen for 20 min and then added to the reaction mixture via syringe. The resulting suspension was heated to 100°C and stirred under nitrogen for 24 h. After completion of the reaction (monitored by TLC), the mixture was cooled to room temperature and diluted with ethyl acetate (30 mL). The organic phase was washed with deionized water (3  $\times$  30 mL) to remove inorganic salts. The combined organic layers were dried over anhydrous Na<sub>2</sub>SO<sub>4</sub>, filtered, and concentrated under reduced pressure. The crude product was passed through a short silica gel plug using ethyl acetate as the eluent. Final drying under vacuum afforded compound 3 as a white solid (1.18 g, 72%). <sup>1</sup>H NMR (400MHz, DMSO)  $\delta$  8.27 (s, 1H), 7.78 (d, J = 2.2 Hz, 1H), 7.71 (dd, J = 8.2, 1.1 Hz, 1H), 7.53 (dd, J = 8.5, 5.4 Hz, 2H), 7.13 (dd, J = 8.7, 2.1 Hz, 1H), 6.91 (d, J = 8.7 Hz, 4H), 6.88 – 6.79 (m, 3H), 4.38 (q, J = 7.0 Hz, 2H), 3.70 (s, 5H), 1.30 (d, J = 7.0 Hz, 2H), 1.28 (s, 11H), 1.15 (s, 2H).

### Synthesis of TCBZ-36

A dry 100 mL two-neck round-bottom flask was evacuated and refilled with nitrogen three times. Compound 3 (2.85 g, 5.19 mmol), 3,6-dibromo-9-(4-methoxyphenyl)-9H-carbazole (compound 4, 1.00 g, 2.33 mmol), and Pd(PPh<sub>3</sub>)<sub>4</sub> (100 mg, 0.09 mmol,  $\sim$ 4 mol%) were added under nitrogen atmosphere. Degassed anhydrous

## Supporting Information

toluene (20 mL, reaction concentration  $\approx$  0.12 M with respect to compound 4) and saturated aqueous potassium carbonate solution (4 mL) were sequentially injected into the flask via syringe. The biphasic mixture was bubbled with nitrogen for an additional 20 min and then heated to 110°C with vigorous stirring for 24 h. After cooling to room temperature, the reaction mixture was diluted with ethyl acetate (30 mL). The organic phase was separated, and the aqueous layer was extracted with ethyl acetate (2  $\times$  20 mL). The combined organic layers were washed with deionized water (2  $\times$  30 mL), dried over anhydrous Na<sub>2</sub>SO<sub>4</sub>, filtered, and concentrated under reduced pressure. The crude product was purified by silica gel column chromatography using petroleum ether/ethyl acetate (10:1, v/v) as the eluent. The desired fractions were collected and evaporated to afford TCBZ-36 as a white solid (1.82 g, 70%). <sup>1</sup>H NMR (400 MHz, DMSO)  $\delta$  8.78 – 8.73 (m, 1H), 8.48 (s, 1H), 7.97 – 7.92 (m, 1H), 7.92 – 7.85 (m, 1H), 7.85 – 7.79 (m, 1H), 7.66 (d, *J* = 8.6 Hz, 1H), 7.55 (dd, *J* = 8.7, 4.5 Hz, 2H), 7.33 (d, *J* = 8.5 Hz, 1H), 7.22 (d, *J* = 8.8 Hz, 1H), 7.18 – 7.10 (m, 1H), 6.90 (d, *J* = 8.6 Hz, 4H), 6.81 (d, *J* = 9.0 Hz, 4H), 4.43 (d, *J* = 8.0 Hz, 2H), 3.87 (s, 2H), 3.66 (s, 6H), 1.34 (t, *J* = 7.1 Hz, 3H), 1.30 – 1.20 (m, 0H), 1.20 (s, 1H), 0.88 – 0.70 (m, 4H). <sup>13</sup>C NMR (101 MHz, CDCl<sub>3</sub>)  $\delta$  158.84, 140.86, 130.55, 128.45, 125.80, 123.98, 123.29, 119.18, 118.86, 115.14, 109.98, 77.26, 55.63, 55.54, 33.62, 29.73, 1.06.

### Synthesis of TCBZ-27

TCBZ-27 was synthesized following the same procedure as described for TCBZ-36, except that compound 5 was used instead of compound 4 in the final Suzuki coupling step. All reaction conditions, solvent volumes, catalyst loading, inert

## Supporting Information

atmosphere control, work-up, and purification procedures were identical. After silica gel column chromatography (petroleum ether/ethyl acetate = 10:1, v/v), TCBZ-27 was obtained as a white solid (1.76 g, 68%). <sup>1</sup>H NMR (400 MHz, DMSO)  $\delta$  8.39 (s, 1H), 8.23 (d,  $J$  = 8.1 Hz, 1H), 7.96 (d,  $J$  = 2.1 Hz, 1H), 7.73 – 7.49 (m, 5H), 7.19 (d,  $J$  = 8.5 Hz, 1H), 7.12 (dd,  $J$  = 8.7, 2.2 Hz, 1H), 6.89 (d,  $J$  = 8.7 Hz, 4H), 6.81 (d,  $J$  = 9.0 Hz, 4H), 4.40 (d,  $J$  = 7.4 Hz, 2H), 3.85 (s, 1H), 3.69 (s, 5H), 1.31 (t,  $J$  = 7.1 Hz, 3H), 1.20 (s, 2H), 0.83 (s, 1H), 0.85 – 0.71 (m, 1H). <sup>13</sup>C NMR (101 MHz, CDCl<sub>3</sub>)  $\delta$  158.94, 142.64, 130.39, 128.87, 123.25, 121.69, 120.38, 119.92, 119.46, 115.34, 108.16, 77.28, 55.59, 55.55, 29.75, 29.49, 22.87, 1.08.

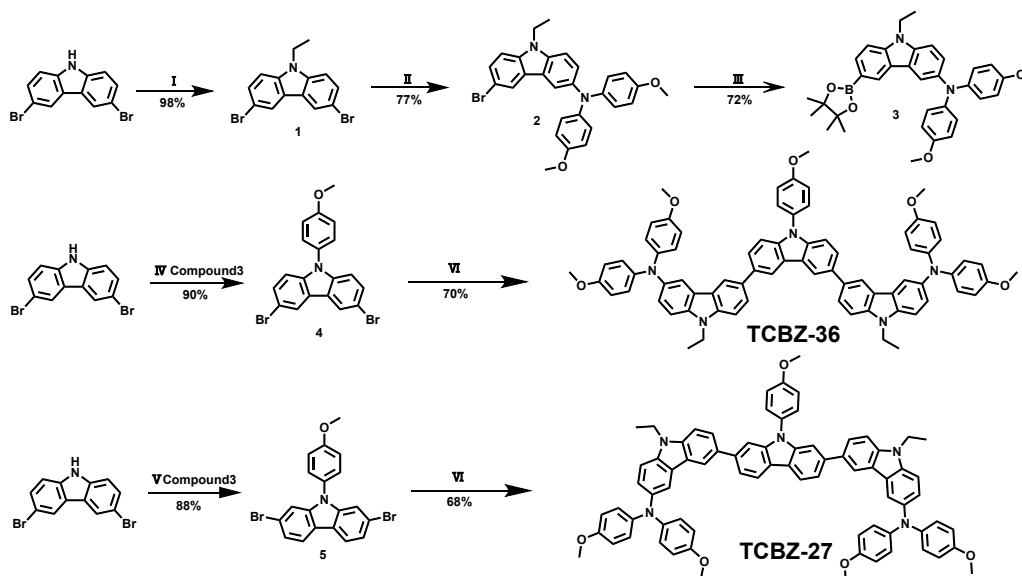

**Scheme S1.** Synthetic routes and chemical structure of TCBZ-27 and TCBZ-36

I): NBS, THF, DMF, 0°C. II): Bis-(4-methoxyphenyl)-amine, Pd<sub>2</sub>(dba)<sub>3</sub>, Tri-tert-butylphosphine, Sodium tert-butoxide, Toluene, 100°C. III): bis(pinacolato)diboron, KOAc, Pd(dppf)Cl<sub>2</sub>, 1,4-dioxane, 100 °C. IV): 4-Iodoanisole, CuI, K<sub>3</sub>PO<sub>4</sub>, 1,4-dioxane, 110 °C. V): 4-Iodoanisole, CuI, K<sub>3</sub>PO<sub>4</sub>, 1,4-dioxane, 110 °C. VI): K<sub>2</sub>CO<sub>3</sub>, Pd(pph<sub>3</sub>)<sub>4</sub>, Toluene, 110°C.



## Supporting Information

**Table S1.** Detailed calculation of cost for the synthesis of 1 g TCBZ-27.

|                                     | Commercially available chemicals      | Price           | Dosage  | Cost     |
|-------------------------------------|---------------------------------------|-----------------|---------|----------|
| <b>Step 1</b>                       | 9-Ethylcarbazole                      | 25 g/177.75 RMB | 0.97 g  | 6.88 RMB |
|                                     | NBS                                   | 500 g/70 RMB    | 0.88 g  | 0.07 RMB |
|                                     | DMF                                   | 500 mL/58 RMB   | 5 mL    | 0.12 RMB |
|                                     | THF                                   | 500 mL/68 RMB   | 30 mL   | 4.08 RMB |
|                                     | Petroleum ether                       | 500 mL/12 RMB   | 150 mL  | 3.6 RMB  |
|                                     | ethyl acetate                         | 500 mL/27 RMB   | 250 mL  | 13.5 RMB |
| <b>Step 2</b>                       | Benzenamine                           | 125 g/25 RMB    | 0.23 g  | 0.05 RMB |
|                                     | Tris(dibenzylideneacetone)dipalladium | 1 g/336 RMB     | 0.05 g  | 0.01 RMB |
|                                     | Bis-(4-methoxyphenyl)-amine           | 25g/321 RMB     | 1.13g   | 14.5 RMB |
|                                     | Sodium tert-butoxide                  | 500g/111.7 RMB  | 0.95g   | 0.2 RMB  |
|                                     | Toluene                               | 500 mL/24 RMB   | 40 mL   | 1.92 RMB |
|                                     | Petroleum ether                       | 500 mL/12 RMB   | 150 mL  | 3.6 RMB  |
|                                     | ethyl acetate                         | 500 mL/27 RMB   | 250 mL  | 13.5 RMB |
| <b>Step 3</b>                       | bis(pinacolato)diboron                | 500 g/950 RMB   | 1.02 g  | 1.94 RMB |
|                                     | Pd(dppf)Cl <sub>2</sub>               | 10 g/800 RMB    | 0.148 g | 11.8 RMB |
|                                     | KOAc                                  | 500 g/40 RMB    | 1.077 g | 0.09 RMB |
|                                     | 1,4-dioxane                           | 500 mL/58 RMB   | 30 mL   | 3.48 RMB |
|                                     | Petroleum ether                       | 500 mL/12 RMB   | 150 mL  | 3.6 RMB  |
|                                     | ethyl acetate                         | 500 mL/27 RMB   | 250 mL  | 13.5 RMB |
| <b>Step 5</b>                       | 3,7-Dibromodibenzosulfolane           | 5 g/48.75 RMB   | 0.63g   | 6.14 RMB |
|                                     | Hexamethyldisilazane                  | 50ml/148.8 RMB  | 0.5ml   | 1.48 RMB |
|                                     | Sodium tert-butoxide                  | 500 g/111.7RMB  | 0.8     | 0.18 RMB |
|                                     | THF                                   | 500 mL/68 RMB   | 20 mL   | 2.72 RMB |
|                                     | 4-methoxyaniline                      | 100 g/46.5 RMB  | 0.2 g   | 0.09 RMB |
|                                     | Petroleum ether                       | 500 mL/12 RMB   | 150 mL  | 3.6 RMB  |
|                                     | ethyl acetate                         | 500 mL/27 RMB   | 250 mL  | 13.5 RMB |
| <b>Step 6</b>                       | Pd(pph <sub>3</sub> ) <sub>4</sub>    | 10 g/679 RMB    | 0.054 g | 3.73 RMB |
|                                     | K <sub>2</sub> CO <sub>3</sub>        | 500 g/22 RMB    | 1 g     | 0.04 RMB |
|                                     | Toluene                               | 500 mL/24 RMB   | 20 mL   | 0.96 RMB |
|                                     | Petroleum ether                       | 500 mL/12 RMB   | 150 mL  | 3.6 RMB  |
|                                     | ethyl acetate                         | 500 mL/27 RMB   | 250 mL  | 13.5 RMB |
| Total cost : 135.52 RMB (18.6 US\$) |                                       |                 |         |          |

**Table S2.** Detailed calculation of cost for the synthesis of 1 g TCBZ-36

## Supporting Information

|                                     | Commercially available chemicals      | Price           | Dosage  | Cost     |
|-------------------------------------|---------------------------------------|-----------------|---------|----------|
| Step 1                              | 9-Ethylcarbazole                      | 25 g/177.75 RMB | 0.97 g  | 6.88 RMB |
|                                     | NBS                                   | 500 g/70 RMB    | 0.88 g  | 0.07 RMB |
|                                     | DMF                                   | 500 mL/58 RMB   | 5 mL    | 0.12 RMB |
|                                     | THF                                   | 500 mL/68 RMB   | 30 mL   | 4.08 RMB |
|                                     | Petroleum ether                       | 500 mL/12 RMB   | 150 mL  | 3.6 RMB  |
|                                     | ethyl acetate                         | 500 mL/27 RMB   | 250 mL  | 13.5 RMB |
| Step 2                              | Benzenamine                           | 125 g/25 RMB    | 0.23 g  | 0.05 RMB |
|                                     | Tris(dibenzylideneacetone)dipalladium | 1 g/336 RMB     | 0.05 g  | 0.01 RMB |
|                                     | Bis-(4-methoxyphenyl)-amine           | 25g/321 RMB     | 1.13g   | 14.5 RMB |
|                                     | Sodium tert-butoxide                  | 500g/111.7 RMB  | 0.95g   | 0.2 RMB  |
|                                     | Toluene                               | 500 mL/24 RMB   | 40 mL   | 1.92 RMB |
|                                     | Petroleum ether                       | 500 mL/12 RMB   | 150 mL  | 3.6 RMB  |
|                                     | ethyl acetate                         | 500 mL/27 RMB   | 250 mL  | 13.5 RMB |
| Step 3                              | bis(pinacolato)diboron                | 500 g/950 RMB   | 1.02 g  | 1.94 RMB |
|                                     | Pd(dppf)Cl <sub>2</sub>               | 10 g/800 RMB    | 0.148 g | 11.8 RMB |
|                                     | KOAc                                  | 500 g/40 RMB    | 1.077 g | 0.09 RMB |
|                                     | 1,4-dioxane                           | 500 mL/58 RMB   | 30 mL   | 3.48 RMB |
|                                     | Petroleum ether                       | 500 mL/12 RMB   | 150 mL  | 3.6 RMB  |
|                                     | ethyl acetate                         | 500 mL/27 RMB   | 250 mL  | 13.5 RMB |
| Step 4                              | 3,6-Dibromocarbazole                  | 5 g/24 RMB      | 0.37g   | 1.78 RMB |
|                                     | Hexamethyldisilazane                  | 50ml/148.8 RMB  | 0.5ml   | 1.48 RMB |
|                                     | Sodium tert-butoxide                  | 500 g/111.7RMB  | 0.8     | 0.18 RMB |
|                                     | THF                                   | 500 mL/68 RMB   | 20 mL   | 2.72 RMB |
|                                     | 4-methoxyaniline                      | 100 g/46.5 RMB  | 0.2 g   | 0.09 RMB |
|                                     | Petroleum ether                       | 500 mL/12 RMB   | 150 mL  | 3.6 RMB  |
|                                     | ethyl acetate                         | 500 mL/27 RMB   | 250 mL  | 13.5 RMB |
| Step 6                              | Pd(pph <sub>3</sub> ) <sub>4</sub>    | 10 g/679 RMB    | 0.054 g | 3.73 RMB |
|                                     | K <sub>2</sub> CO <sub>3</sub>        | 500 g/22 RMB    | 1 g     | 0.04 RMB |
|                                     | Toluene                               | 500 mL/24 RMB   | 20 mL   | 0.96 RMB |
|                                     | Petroleum ether                       | 500 mL/12 RMB   | 150 mL  | 3.6 RMB  |
|                                     | ethyl acetate                         | 500 mL/27 RMB   | 250 mL  | 13.5 RMB |
| Total cost : 131.17 RMB (18.3 US\$) |                                       |                 |         |          |

**Table S3.** Comparison of synthesis cost and commercial price of TCBZ-27 with some widely used HTMs.

| Compound | Materials cost | Commercial price |
|----------|----------------|------------------|
|----------|----------------|------------------|

## Supporting Information

|              | (US \$/1g)           | (US \$/1g)         |
|--------------|----------------------|--------------------|
| TCBZ-27      | 18.6                 |                    |
| TCBZ-36      | 18.3                 |                    |
| Spiro-OMeTAD | 91.67 <sup>[6]</sup> | 500 <sup>[7]</sup> |

**Table S4.** Summarizes the optical and electrochemical properties of TCBZ-36 and TCBZ-27.

| HTMs    | $\lambda_{\text{int}}^a$<br>/nm | $E_g^b$<br>/eV | $E_{\text{HOMO}}$<br>/eV | $E_{\text{LUMO}}^c$<br>/eV | Hole<br>mobility<br>/cm <sup>2</sup> ·V <sup>-1</sup> ·s <sup>-1</sup> | Conductivity<br>/S·cm <sup>-1</sup> |
|---------|---------------------------------|----------------|--------------------------|----------------------------|------------------------------------------------------------------------|-------------------------------------|
| TCBZ-36 | 384                             | 3.23           | -5.15                    | -1.92                      | 2.48×10 <sup>-4</sup>                                                  | 1.22×10 <sup>-4</sup>               |
| TCBZ-27 | 408                             | 3.04           | -5.15                    | -2.11                      | 3.25×10 <sup>-4</sup>                                                  | 4.04×10 <sup>-4</sup>               |

<sup>a</sup> Starting absorption wavelength in CH<sub>2</sub>Cl<sub>2</sub> solution: point of crossing of UV absorption spectrum and fluorescence emission spectrum. <sup>b</sup> Estimated from the UV onset absorption wavelength using the formula  $E_g = 1240/\lambda_{\text{int}}$ . <sup>c</sup>  $E_{\text{LUMO}} = E_{\text{HOMO}} + E_g$ .

**Table S5.** Best photovoltaic performance of PSCs based on different HTMs.

| HTMs         | $V_{oc}/V$ | $J_{sc}/\text{mA}\cdot\text{cm}^{-2}$ | $FF/\%$ | PCE/% |
|--------------|------------|---------------------------------------|---------|-------|
| Spiro-OMeTAD | 1.14       | 25.7                                  | 84.5    | 24.7  |
| TCBZ-36      | 1.12       | 25.2                                  | 79.8    | 22.5  |
| TCBZ-27      | 1.16       | 26.2                                  | 83.5    | 25.2  |

**Table S6.** TRPL fitting parameters for perovskite films and hole-transporting materials.

| Sample           | $\tau_1$ (ns) | $R_1$ | $\tau_2$ (ns) | $R_2$ | $\tau_{\text{avg}}$ (ns) |
|------------------|---------------|-------|---------------|-------|--------------------------|
| perovskite       | 25            | 0.13  | 425.66        | 0.87  | 373.57                   |
| Perovskite/TCBZ- | 8.49          | 0.84  | 232.8         | 0.16  | 44.38                    |

Supporting Information

|                  |      |      |       |      |       |
|------------------|------|------|-------|------|-------|
| Perovskite/TCBZ- | 5.97 | 0.63 | 40.04 | 0.37 | 18.64 |
| 27               |      |      |       |      |       |

**Table S7. Key PV parameters (Voc, Jsc, FF, and PCE) based on TCBZ-27**

| TCBZ-27 | <i>Voc</i> /V | <i>Jsc</i> /mA·cm <sup>-2</sup> | <i>FF</i> /% | PCE/% |
|---------|---------------|---------------------------------|--------------|-------|
| 1       | 1.14          | 26.0                            | 82.1         | 24.3  |
| 2       | 1.18          | 25.5                            | 81.8         | 24.3  |
| 3       | 1.12          | 26.5                            | 82.3         | 24.3  |
| 4       | 1.15          | 25.7                            | 83.1         | 24.4  |
| 5       | 1.16          | 25.9                            | 82.6         | 24.5  |
| 6       | 1.13          | 26.4                            | 82.8         | 24.5  |
| 7       | 1.14          | 26.3                            | 83.0         | 24.6  |
| 8       | 1.17          | 25.8                            | 82.5         | 24.7  |
| 9       | 1.15          | 26.1                            | 83.2         | 24.8  |
| 10      | 1.16          | 26.2                            | 83.5         | 25.2  |

**Table S8. Key PV parameters (Voc, Jsc, FF, and PCE) based on TCBZ-36**

| TCBZ-36 | <i>Voc</i> /V | <i>Jsc</i> /mA·cm <sup>-2</sup> | <i>FF</i> /% | PCE/% |
|---------|---------------|---------------------------------|--------------|-------|
| 1       | 1.12          | 25.2                            | 79.8         | 22.5  |
| 2       | 1.13          | 25.0                            | 79.5         | 22.1  |
| 3       | 1.11          | 25.3                            | 79.2         | 21.8  |
| 4       | 1.14          | 24.8                            | 78.9         | 21.7  |
| 5       | 1.12          | 24.7                            | 79.3         | 21.5  |
| 6       | 1.09          | 25.5                            | 78.5         | 21.3  |

## Supporting Information

|    |      |      |      |      |
|----|------|------|------|------|
| 7  | 1.10 | 25.4 | 78.7 | 21.5 |
| 8  | 1.15 | 24.5 | 78.3 | 21.2 |
| 9  | 1.08 | 25.1 | 78.1 | 21.1 |
| 10 | 1.11 | 24.6 | 77.9 | 21.0 |

**Table S9. Key PV parameters ( $V_{oc}$ ,  $J_{sc}$ , FF, and PCE) based on Spiro-OMeTAD**

| Spiro-OMeTAD | $V_{oc}/V$ | $J_{sc}/\text{mA}\cdot\text{cm}^{-2}$ | FF/% | PCE/% |
|--------------|------------|---------------------------------------|------|-------|
| 1            | 1.14       | 25.7                                  | 84.5 | 24.7  |
| 2            | 1.15       | 25.5                                  | 83.2 | 24.2  |
| 3            | 1.13       | 25.8                                  | 82.8 | 23.9  |
| 4            | 1.16       | 24.9                                  | 83.0 | 23.7  |
| 5            | 1.12       | 25.9                                  | 82.5 | 23.6  |
| 6            | 1.14       | 24.8                                  | 82.7 | 23.5  |
| 7            | 1.11       | 26.0                                  | 82.1 | 23.4  |
| 8            | 1.10       | 25.6                                  | 81.8 | 23.2  |
| 9            | 1.13       | 24.7                                  | 82.3 | 23.1  |
| 10           | 1.12       | 25.3                                  | 81.5 | 22.7  |

## Supporting Information

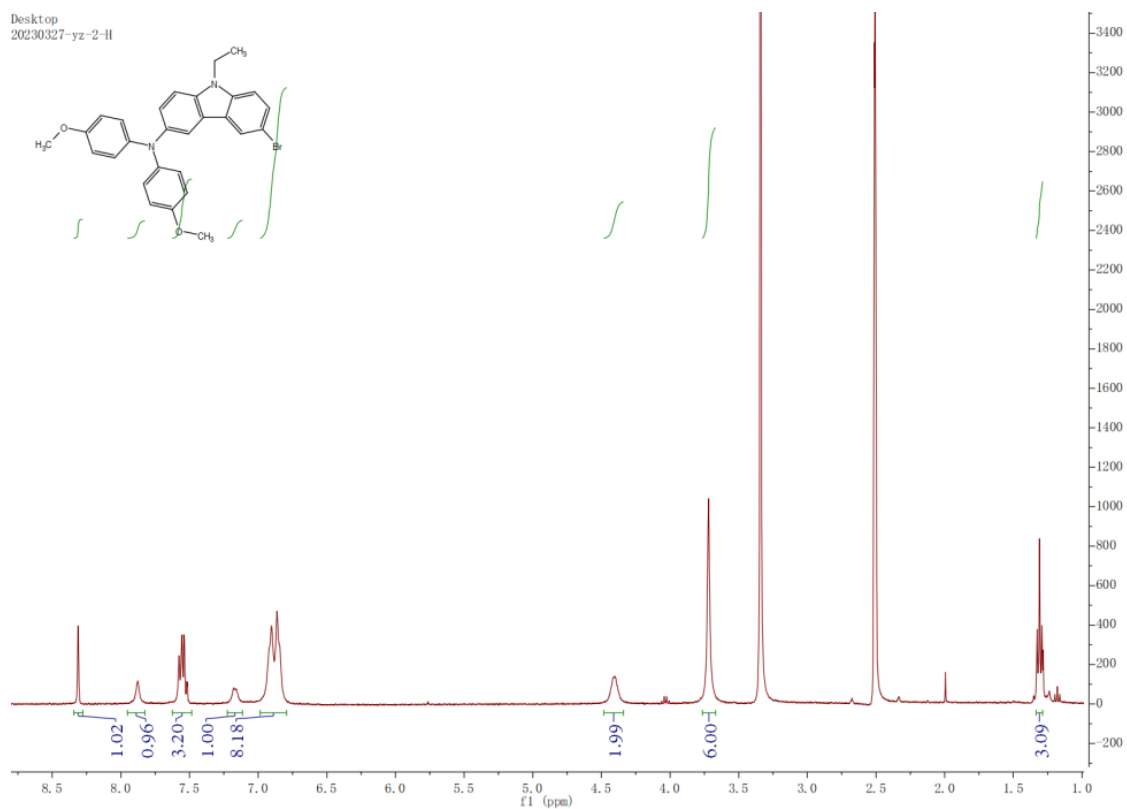

Figure S1.  $^1\text{H}$  NMR spectrum of compound 2 recorded in  $\text{DMSO-d}_6$

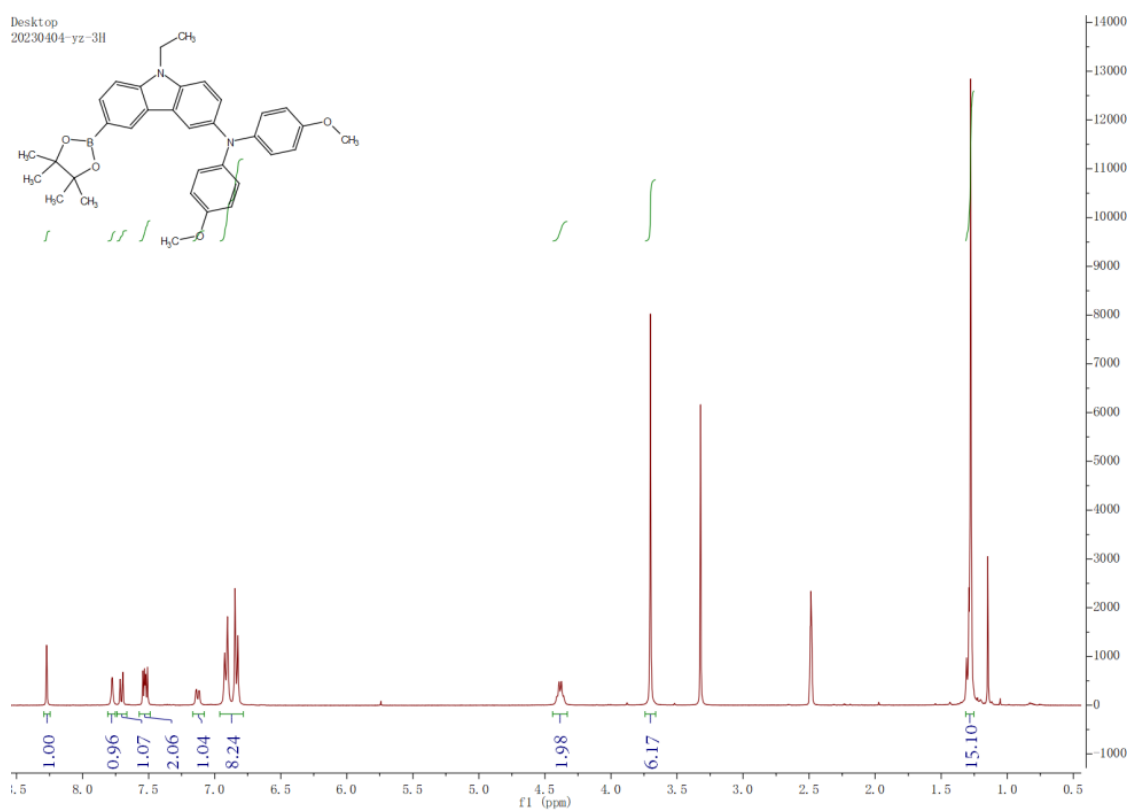

Figure S2.  $^1\text{H}$  NMR spectrum of compound 3 recorded in  $\text{DMSO-d}_6$

## Supporting Information

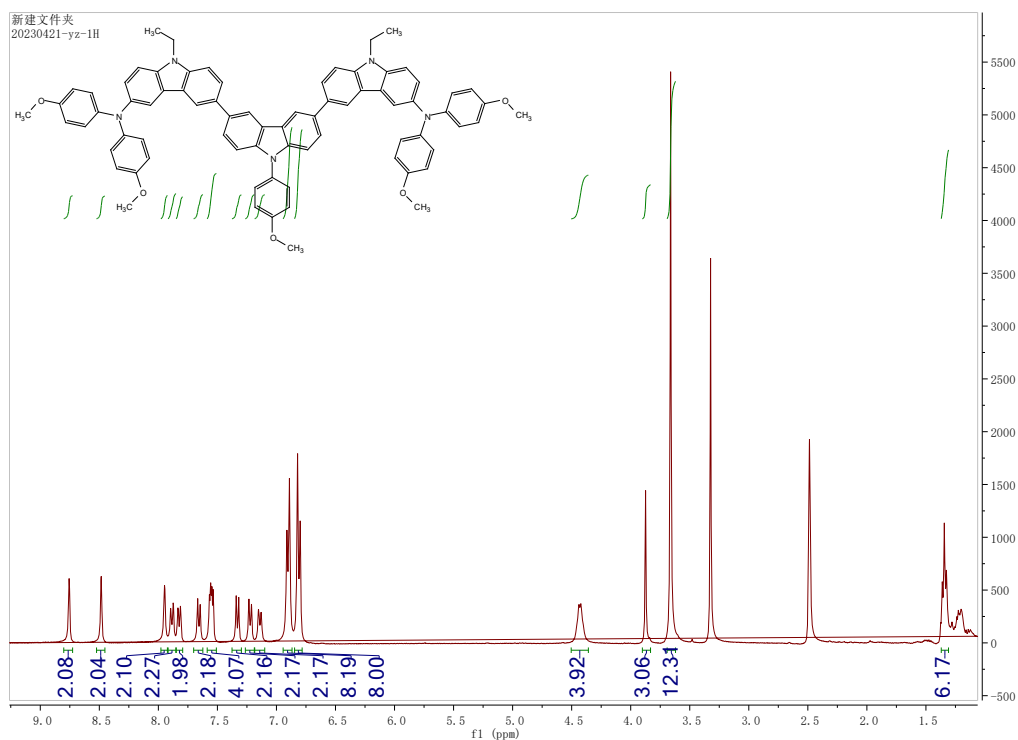

Figure S3. <sup>1</sup>H NMR spectrum of TCBZ-36 recorded in DMSO-d<sub>6</sub>

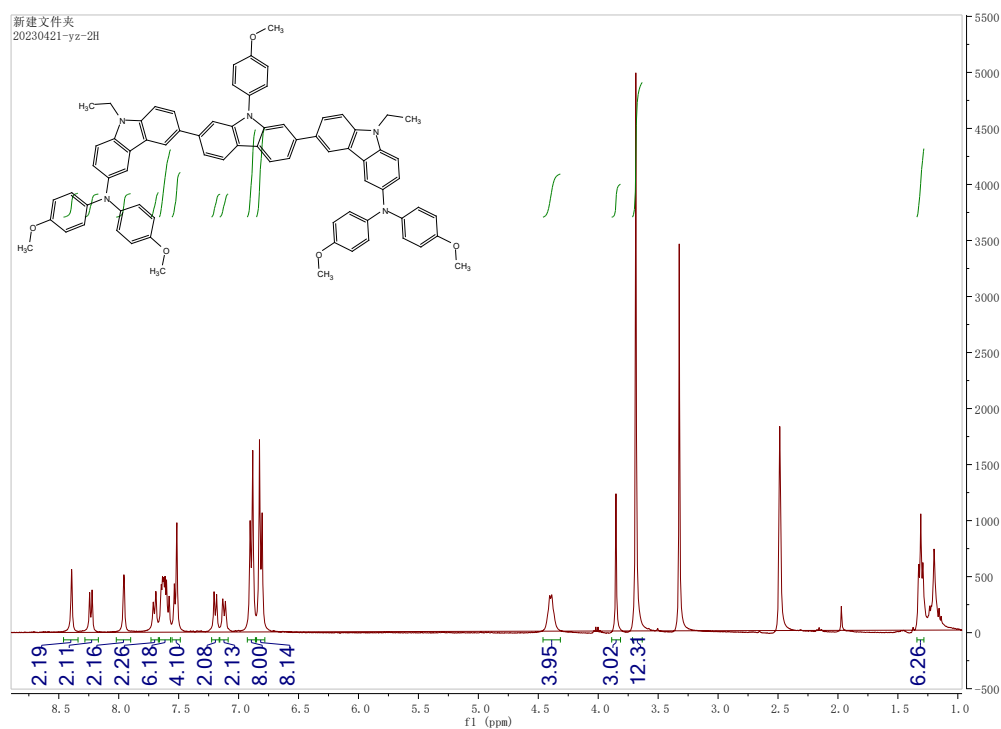

Figure S4. <sup>1</sup>H NMR spectrum of TCBZ-27 recorded in DMSO-d<sub>6</sub>

## Supporting Information

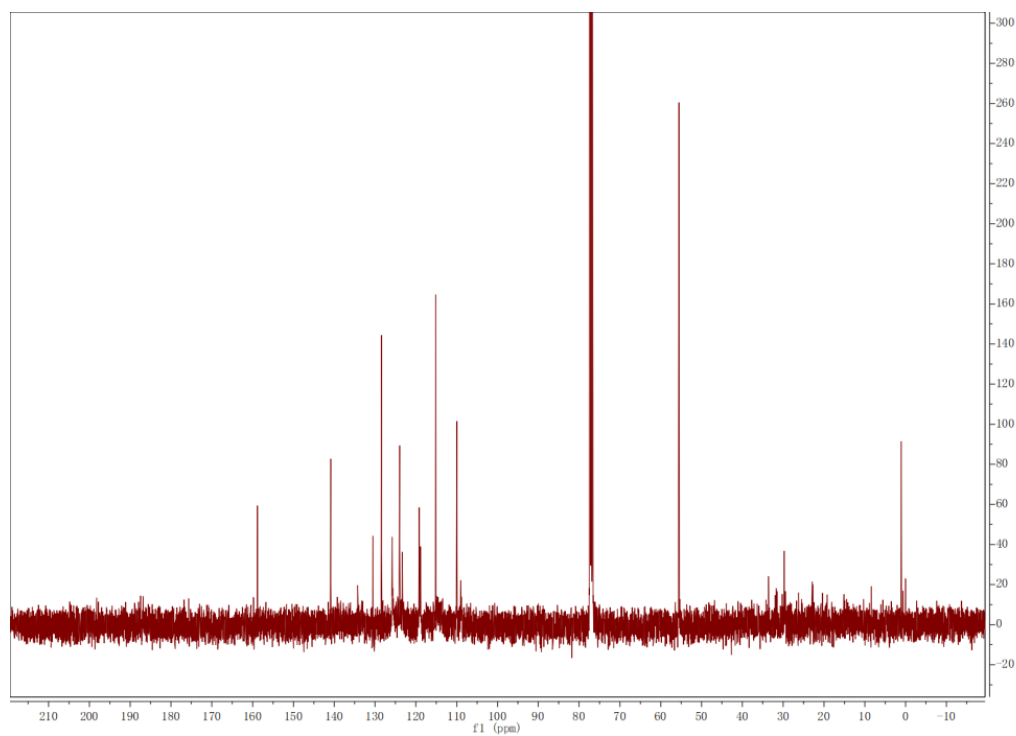

Figure S5.  $^{13}\text{C}$  NMR spectrum of TCBZ-36 recorded in  $\text{CDCl}_3$

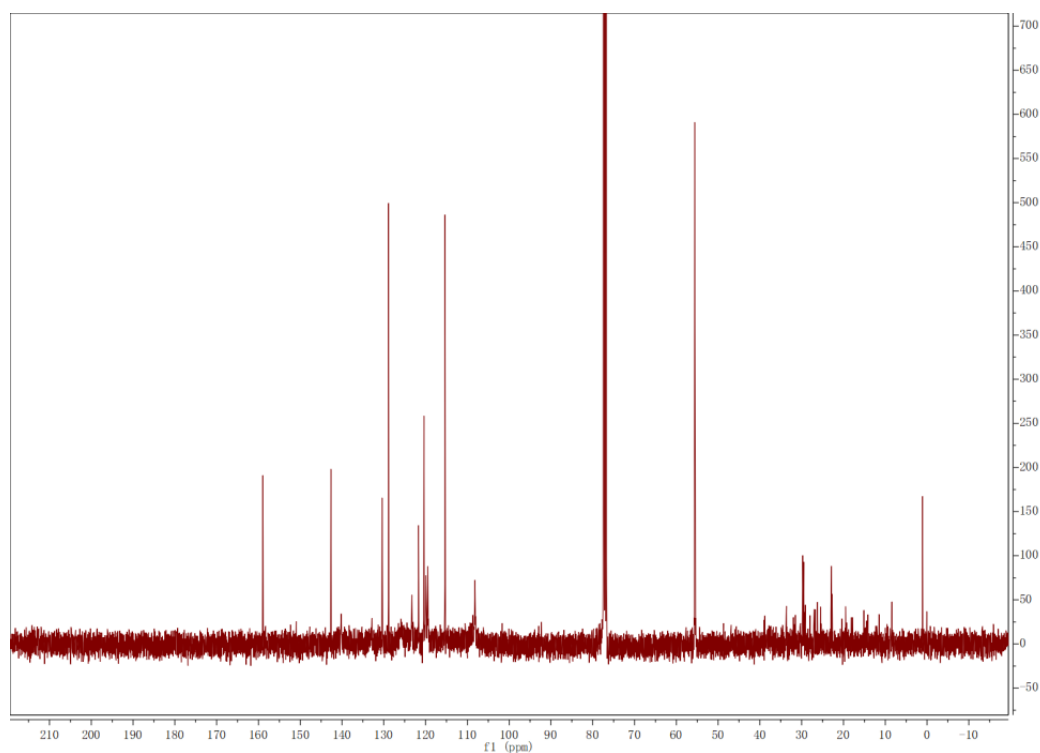

Figure S6.  $^{13}\text{C}$  NMR spectrum of TCBZ-27 recorded in  $\text{CDCl}_3$



## Supporting Information

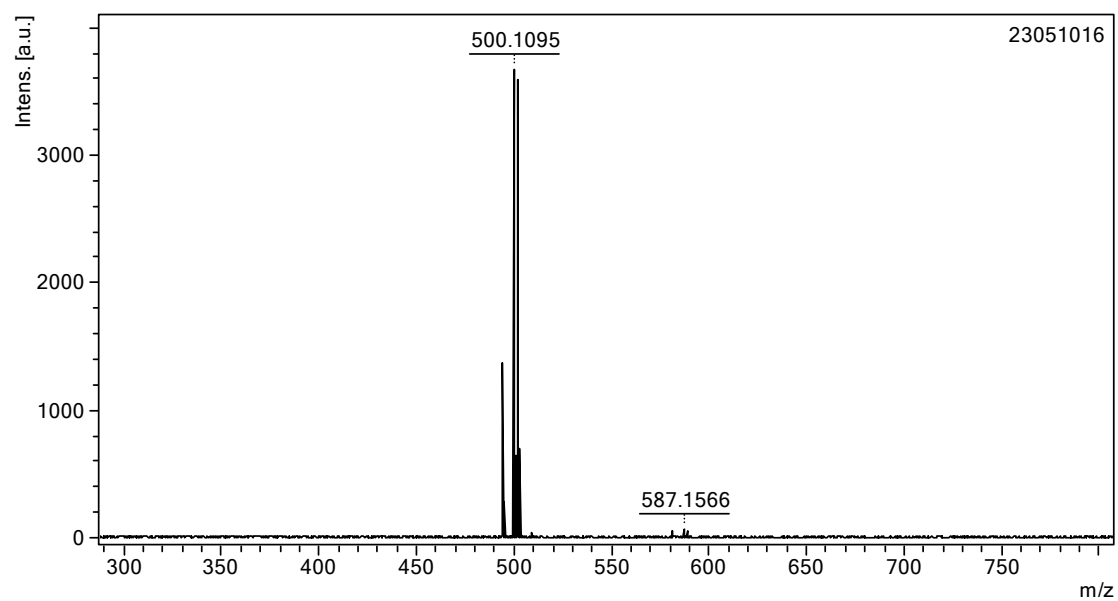

Figure S7. HR-MS of compound 2

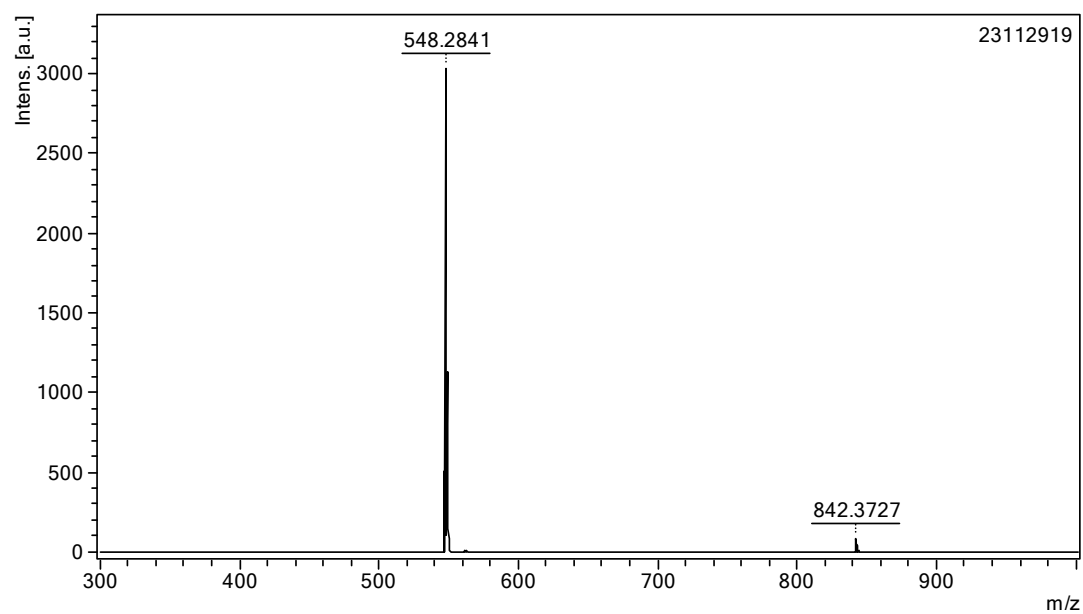

Figure S8. HR-MS of compound 3

## Supporting Information

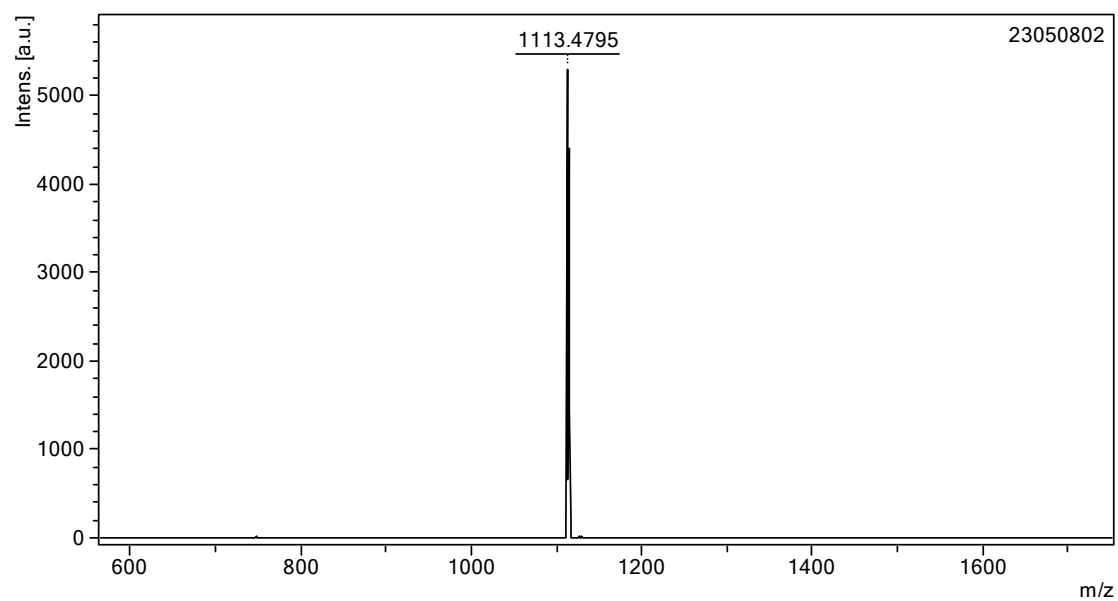

Figure S9. HR-MS of TCBZ-36

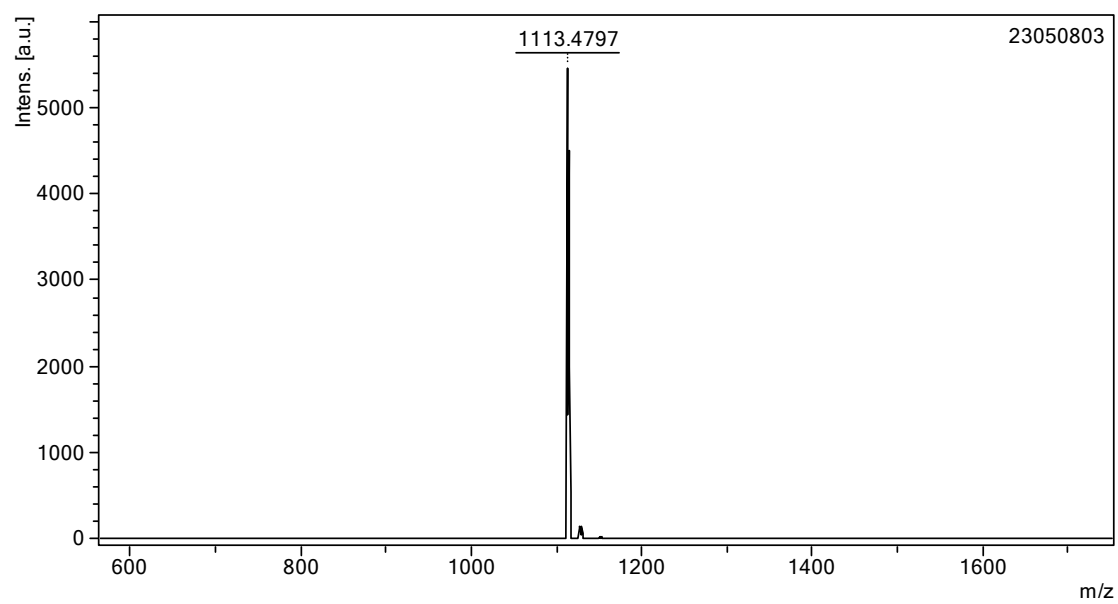

Figure S10. HR-MS of TCBZ-27

## Supporting Information

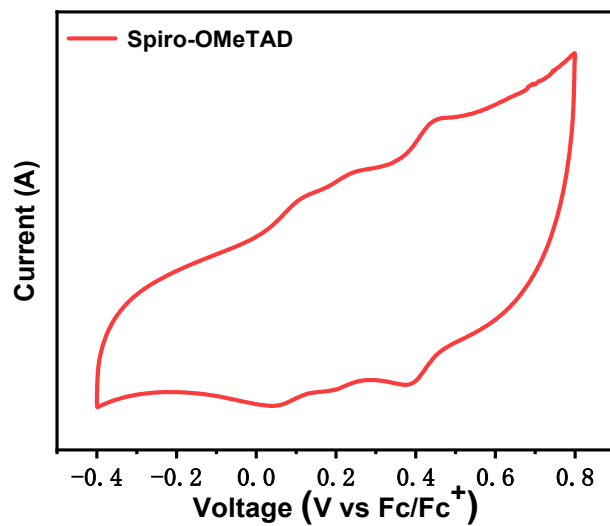

**Figure S11.** Cyclic voltammetry of Spiro-OMeTAD in CH<sub>2</sub>Cl<sub>2</sub> solution.

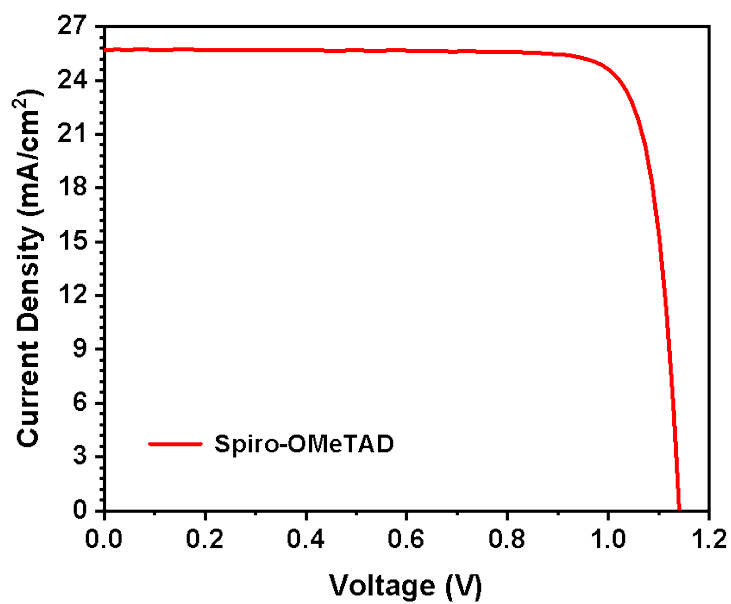

**Figure S12.** Current-voltage (*J-V*) curves for PSCs based on Spiro-OMeTAD.

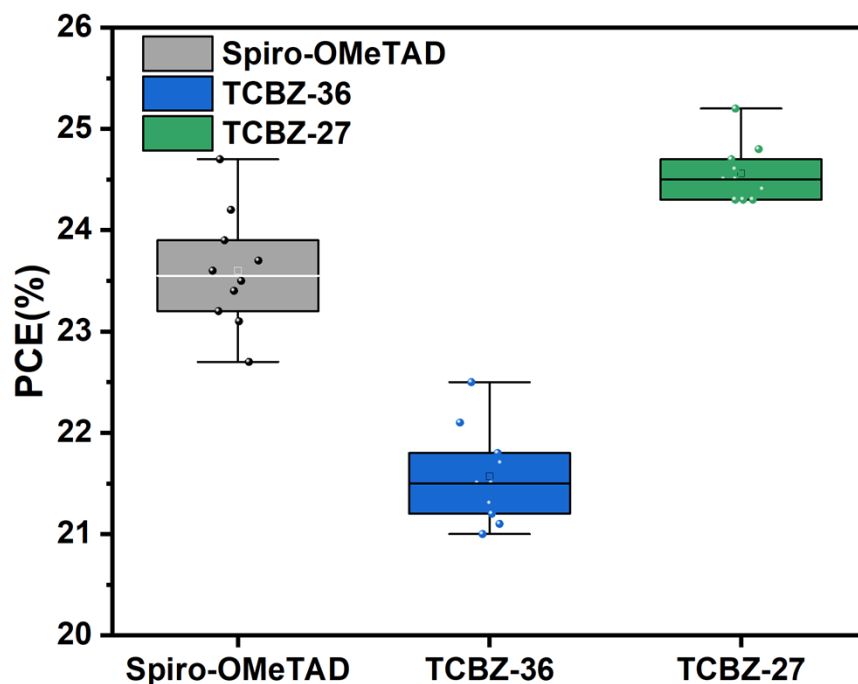

**Figure S13.** PCE based on at least 10 devices.

## References

1. Rakstys, K.; Paek, S.; Gao, P.; Gratia, P.; Marszalek, T.; Grancini, G.; Cho, K. T.; Genevicius, K.; Jankauskas, V.; Pisula, W.; Nazeeruddin, M. K., Molecular engineering of face-on oriented dopant-free hole transporting material for perovskite solar cells with 19% PCE†. *J. Mater. Chem. A* **2017**, 7 (17), 7633-8134.
2. Song, B.; Zhang, H.; Ding, Z. Method for synthesizing N-phenylcarbazole compound by using sulfur dioxide bismuth compound. CN109516947, 2019.
3. Wong, W.-Y.; Liu, L.; Cui, D.; Leung, L. M.; Kwong, C.-F.; Lee, T.-H.; Ng, H.-F., Synthesis and characterization of blue-light-emitting alternating copolymers of 9,9-dihexylfluorene and 9-arylcarbazole. *Macromolecules* **2005**, 38 (12), 4970-4976.

## Supporting Information

4. Xia, C.; Advincula, R. C., Decreased Aggregation Phenomena in Polyfluorenes by Introducing Carbazole Copolymer Units. *Macromolecules* **2001**, *34* (17), 5854–5859.
5. Xue, S.; Cheng, Y.; Zong, X.; Luo, M.; Cen, R. Organic hole transport material with phenanthroimidazole as mother nucleus and application thereof for perovskite solar cell. CN111808026, 2020.
6. Chen, L.; Zhang, B.; Cheng, Y.; Xie, Z.; Wang, L.; Jing, X.; Wang, F., Pure and Saturated Red Electroluminescent Polyfluorenes with Dopant/Host System and PLED Efficiency/Color Purity Trade-Offs. *Adv. Funct. Mater.* **2010**, *20* (18), 3143-3153.
7. Petrus, M. L.; Bein, T.; Dingemans, T. J.; Docampo, P., A low cost azomethine-based hole transporting material for perovskite photovoltaics†. *J. Mater. Chem. A* **2015**, *21* (23), 12101-12560.
